# Supplementary material for: Inhibition of cell cycle progression by the hydroxytyrosol–cetuximab combination yields enhanced chemotherapeutic efficacy in colon cancer cells
Source: PubMed Central journal article supplement (PMC5669961; doi:10.18632/oncotarget.20544), 2017-08-24
Supplement: oncotarget-08-83207-s001.pdf [file oncotarget-08-83207-s001.pdf]

## Inhibition of cell cycle progression by the hydroxytyrosol–cetuximab combination yields enhanced chemotherapeutic efficacy in colon cancer cells

### SUPPLEMENTARY MATERIALS

**Supplementary Table 1: Cell cycle analysis in cancer cells treated with low doses of HT and cetuximab combined in Figure 4**

| HT-29 cells          | % of cells in phase sub G <sub>0</sub> /G <sub>1</sub> | % of cells phase G <sub>0</sub> /G <sub>1</sub> | % of cells in phase S | % of cells in phase G <sub>2</sub> /M |
|----------------------|--------------------------------------------------------|-------------------------------------------------|-----------------------|---------------------------------------|
| 0.1 % FBS            | 4.47±1.2                                               | 66.09±5.8                                       | 8.04±1.2              | 21.4±3.5                              |
| HT                   | 4.06±1.09                                              | 66.41±12                                        | 6.03±2.1              | 23.5±4.9                              |
| Cetuximab            | 4.02±0.8                                               | 66.4±8.9                                        | 6.37±2                | 23.2±5.6                              |
| HT + Cetuximab       | 11.42±2.1***                                           | 56.5±7                                          | 5.9±2.3               | 26.15±4.6                             |
| 0.1% FBS + EGF       | 3.69±1.2                                               | 57.81±8.9                                       | 15.64±2.1             | 22.83±5.8                             |
| HT+ EGF              | 4.54±0.788                                             | 65.01±5.6                                       | 12.43±1.3             | 17.93±4.7                             |
| Cetuximab + EGF      | 3.91±1.1                                               | 64.83±7.8                                       | 13.02±1.1             | 18.22±3.4                             |
| HT + Cetuximab + EGF | 11.36±2###                                             | 50.77±11                                        | 4.97±1.5###           | 32.9±3.5#                             |

HT-29 cells were exposed to HT (1  $\mu$ M) or cetuximab (10  $\mu$ g/ml) alone or in combination in presence of EGF (25 ng/ml) for 48 h. The percentage of cells at each stage of the cell cycle was analyzed by flow cytometry after DNA staining with propidium iodide.

\*\*\*P<0.001 vs. Cetuximab-treated cells. #P<0.05, ###P<0.001 vs. cetuximab + EGF-treated cells.

**Supplementary Table 2: Cell cycle analysis in cancer cells treated with low doses of HT and cetuximab combined in Figure 4**

| WiDr cells           | % of cells in phase sub G <sub>0</sub> /G <sub>1</sub> | % of cells in phase G <sub>0</sub> /G <sub>1</sub> | % of cells in phase S | % of cells in phase G <sub>2</sub> /M |
|----------------------|--------------------------------------------------------|----------------------------------------------------|-----------------------|---------------------------------------|
| 0.1 % FBS            | 6.03±2                                                 | 67.54±3.5                                          | 9.1±1.1               | 17.22±3.3                             |
| HT                   | 9.48±3.11                                              | 63.49±5.6                                          | 8.03±1.9              | 19±4.1                                |
| Cetuximab            | 9.49±2.5                                               | 63.14±8.7                                          | 9.37±2.4              | 18±3.2                                |
| HT + Cetuximab       | 14.27±2.1*                                             | 55.84±4.9                                          | 9.89±2.1              | 27±4.1                                |
| 0.1% FBS + EGF       | 6.15±1.1                                               | 56.59±7.8                                          | 13.44±1.4             | 19.28±0.9                             |
| HT + EGF             | 6.77±2.7                                               | 63.79±5.6                                          | 8.43±1.5              | 21.01±4.2                             |
| Cetuximab + EGF      | 5.77±2.9                                               | 63.48±6.7                                          | 9.02±1.3              | 21.73±7.1                             |
| HT + Cetuximab + EGF | 12.84±3.4####                                          | 52.59±8.3                                          | 3.77±1.7###           | 30.8±1.5##                            |

WiDr cells were exposed to HT (1 μM) or cetuximab (10 μg/ml) alone or in combination in presence of EGF (25 ng/ml) for 48 h. The percentage of cells at each stage of the cell cycle was analyzed by flow cytometry after DNA staining with propidium iodide.

\*P <0.05, vs. Cetuximab-treated cells. ###P<0.01, ####P <0.001 vs. cetuximab + EGF-treated cells.

Supplementary Table 3: Quantification of p18, p21 and p27 protein expression in HT-29 cells

| A.D.U. ± SD          | P27          | P21          | P18       |
|----------------------|--------------|--------------|-----------|
| Basal                | 0.30±0.03    | 0.43±0.02    | 0.83±0.05 |
| EGF                  | 0.27±0.02    | 0.48±0.04    | 0.63±0.04 |
| HT + EGF             | 0.420±0.05## | 0.51±0.04    | 0.84±0.03 |
| Cetuximab + EGF      | 0.39±0.03#   | 0.49±0.03    | 0.71±0.02 |
| HT + Cetuximab + EGF | 0.72±0.04ççç | 0.73±0.05ççç | 0.61±0.01 |

Supplementary Table 4: Quantification of p18, p21 and p27 protein expression in WiDr cells

| A.D.U. $\pm$ SD      | P27                              | P21                               | P18             |
|----------------------|----------------------------------|-----------------------------------|-----------------|
| Basal                | 0.32 $\pm$ 0.03                  | 0.36 $\pm$ 0.02                   | 0.24 $\pm$ 0.05 |
| EGF                  | 0.46 $\pm$ 0.02                  | 0.05 $\pm$ 0.04***                | 0.23 $\pm$ 0.04 |
| HT + EGF             | 0.40 $\pm$ 0.05                  | 0.24 $\pm$ 0.04#                  | 0.12 $\pm$ 0.09 |
| Cetuximab + EGF      | 0.45 $\pm$ 0.03                  | 0.31 $\pm$ 0.01#                  | 0.27 $\pm$ 0.02 |
| HT + Cetuximab + EGF | 0.89 $\pm$ 0.0 $\zeta\zeta\zeta$ | 0.51 $\pm$ 0.05 $\zeta\zeta\zeta$ | 0.32 $\pm$ 0.01 |

Supplementary Table 5: Quantification of cyclin D1, D3, E1 and B1 protein expression in HT-29 cells

| A.D.U. $\pm$ SD             | Cyclin D1          | Cyclin D3         | Cyclin E1         | Cyclin B1          |
|-----------------------------|--------------------|-------------------|-------------------|--------------------|
| <b>Basal</b>                | 0.22 $\pm$ 0.03    | 0.57 $\pm$ 0.02   | 0.44 $\pm$ 0.05   | 0.78 $\pm$ 0.05    |
| <b>EGF</b>                  | 0.37 $\pm$ 0.02**  | 0.75 $\pm$ 0.04*  | 0.54 $\pm$ 0.04*  | 0.57 $\pm$ 0.04*   |
| <b>HT + EGF</b>             | 0.240 $\pm$ 0.05## | 0.85 $\pm$ 0.04   | 0.65 $\pm$ 0.03   | 0.79 $\pm$ 0.09#   |
| <b>Cetuximab + EGF</b>      | 0.23 $\pm$ 0.03##  | 0.87 $\pm$ 0.0    | 0.46 $\pm$ 0.02   | 0.56 $\pm$ 0.02    |
| <b>HT + Cetuximab + EGF</b> | 0.19 $\pm$ 0.04ç   | 0.59 $\pm$ 0.05çç | 0.25 $\pm$ 0.0ççç | 0.07 $\pm$ 0.01ççç |

Supplementary Table 6: Quantification of cyclin D1, D3, E1 and B1 protein expression in WiDr cells

| A.D.U. $\pm$ SD             | Cyclin D1         | Cyclin D3         | Cyclin E1        | Cyclin B1          |
|-----------------------------|-------------------|-------------------|------------------|--------------------|
| <b>Basal</b>                | 0.43 $\pm$ 0.03   | 0.94 $\pm$ 0.02   | 0.60 $\pm$ 0.05  | 0.08 $\pm$ 0.05    |
| <b>EGF</b>                  | 0.68 $\pm$ 0.02*  | 0.83 $\pm$ 0.04   | 0.38 $\pm$ 0.04* | 0.58 $\pm$ 0.04*** |
| <b>HT + EGF</b>             | 0.38 $\pm$ 0.05#  | 0.58 $\pm$ 0.04#  | 0.28 $\pm$ 0.09  | 0.05 $\pm$ 0.09### |
| <b>Cetuximab + EGF</b>      | 0.43 $\pm$ 0.03#  | 0.67 $\pm$ 0.01#  | 0.38 $\pm$ 0.02  | 0.09 $\pm$ 0.02### |
| <b>HT + Cetuximab + EGF</b> | 0.18 $\pm$ 0.04çç | 0.40 $\pm$ 0.05çç | 0.23 $\pm$ 0.01ç | 0.05 $\pm$ 0.01    |

Supplementary Table 7: Quantification of CDK2,4 and 6 protein expression in HT-29 cells

| A.D.U. $\pm$ SD      | CDK2                | CDK4               | CDK6               |
|----------------------|---------------------|--------------------|--------------------|
| Basal                | 0.54 $\pm$ 0.03     | 0.21 $\pm$ 0.02    | 0.25 $\pm$ 0.05    |
| EGF                  | 0.50 $\pm$ 0.02     | 0.53 $\pm$ 0.04*** | 0.34 $\pm$ 0.04*   |
| HT + EGF             | 0.07 $\pm$ 0.05###  | 0.29 $\pm$ 0.04##  | 0.13 $\pm$ 0.03##  |
| Cetuximab + EGF      | 0.11 $\pm$ 0.03###  | 0.39 $\pm$ 0.03##  | 0.21 $\pm$ 0.02#   |
| HT + Cetuximab + EGF | 0.007 $\pm$ 0.04ççç | 0.36 $\pm$ 0.05    | 0.06 $\pm$ 0.01ççç |

Supplementary Table 8: Quantification of CDK2, 4 and 6 protein expression in WiDr cells

| A.D.U. $\pm$ SD             | CDK2                              | CDK4                         | CDK6                         |
|-----------------------------|-----------------------------------|------------------------------|------------------------------|
| <b>Basal</b>                | 0.21 $\pm$ 0.03                   | 1.41 $\pm$ 0.02              | 0.64 $\pm$ 0.05              |
| <b>EGF</b>                  | 0.39 $\pm$ 0.02*                  | 1.95 $\pm$ 0.04**            | 0.99 $\pm$ 0.04*             |
| <b>HT + EGF</b>             | 0.37 $\pm$ 0.05                   | 1.81 $\pm$ 0.04              | 1.07 $\pm$ 0.09              |
| <b>Cetuximab + EGF</b>      | 0.23 $\pm$ 0.03                   | 1.2 $\pm$ 0.01#              | 0.65 $\pm$ 0.02#             |
| <b>HT + Cetuximab + EGF</b> | 0.07 $\pm$ 0.04 $\zeta\zeta\zeta$ | 0.08 $\pm$ 0.02 $\zeta\zeta$ | 0.41 $\pm$ 0.01 $\zeta\zeta$ |

Quantification of cell cycle checkpoint proteins (see Figure 5 for images) in HT-29 cells (3, 5, 7) and WiDr cells (4, 6, 8) exposed to HT or cetuximab (alone or in combination) in presence of EGF for 48 h and analyzed by western blot.

\*P<0.05, \*\*P<0.01, \*\*\*P<0.001 vs. untreated cells. #P<0.05, ##P<0.01, ###P<0.001 vs. EGF-treated cells.  $\zeta$ P<0.05,  $\zeta\zeta$ P<0.01,  $\zeta\zeta\zeta$ P<0.001 vs. HT or cetuximab + EGF-treated cells.
